# Supplementary material for: Retrovirus-Derived RTL9 Plays an Important Role in Innate Antifungal Immunity in the Eutherian Brain
Source: MDPI journal article supplement (doi:10.3390/ijms241914884), 2023-10-04
Supplement: s1 [file s1]

**Fig. S1 Comparison of the RTL9 protein in the 10 representative eutherian species**

Multiple alignment of the RTL9 protein sequences in 10 eutherian species: the mouse, rat, human, chimpanzee, dog, horse, elephant, manatee, armadillo and sloth. The identical amino acids in the 10 species are depicted with an asterisk (\*) below the alignment. Three regions corresponding to the herpes BLLF1 super family, PHA03247 super family and capsid domain of sushi-ichi GAG (Fig. 1A) are shown as gray, orange and blue boxes, respectively. Maximal and minimal GAG-like regions are shown as red boxes and red dashed boxes, respectively. The end of RTL9 $\Delta$ C, just before the maximal GAG-like region, is indicated by a red arrow with a short vertical line on its head. Details are provided in the Comparative Genome analysis in the Materials and Methods section.

## View Concise Results ▾ ?

Graphical summary  Zoom to residue level [show extra options »](#)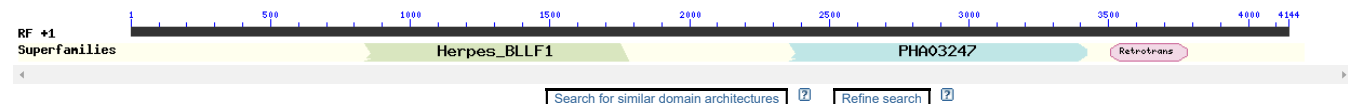

?

| Name                                                                                                                                                                                                 | Accession               | Description                                                                                        | Interval  | E-value  |
|------------------------------------------------------------------------------------------------------------------------------------------------------------------------------------------------------|-------------------------|----------------------------------------------------------------------------------------------------|-----------|----------|
| Retrotransposon gag super family                                                                                                                                                                     | <a href="#">cd14948</a> | Retrotransposon gag protein; Gag or Capsid-like proteins from LTR retrotransposons. There is a ... | 3505-3780 | 7.31e-08 |
| Retrotransposon gag protein; Gag or Capsid-like proteins from LTR retrotransposons. There is a central motif GGXXEXXXXXXXLXXKH that is common to Retroviridae gag-proteins, but is poorly conserved. |                         |                                                                                                    |           |          |

The actual alignment was detected with superfamily member [pfam03732](#):

**Pssm-ID: 455293 Cd Length: 97 Bit Score: 51.56 E-value: 7.31e-08**

NM\_001040434.2 1169 LVS<sup>1.1</sup>SL<sup>1.1</sup>H<sup>1.1</sup>-GA<sup>1.1</sup>ER<sup>1.1</sup>W<sup>1.1</sup>-S<sup>1.1</sup>L<sup>1.1</sup>Q<sup>1.1</sup>M<sup>1.1</sup>E<sup>1.1</sup>V<sup>1.1</sup>G<sup>1.1</sup>N<sup>1.1</sup>P<sup>1.1</sup>I<sup>1.1</sup>S<sup>1.1</sup>S<sup>1.1</sup>D<sup>1.1</sup>-K<sup>1.1</sup>A<sup>1.1</sup>F<sup>1.1</sup>L<sup>1.1</sup>R<sup>1.1</sup>sqg<sup>1.1</sup>I<sup>1.1</sup>Y<sup>1.1</sup>D<sup>1.1</sup>S<sup>1.1</sup>L<sup>1.1</sup>E<sup>1.1</sup>I<sup>1.1</sup>D<sup>1.1</sup>I<sup>1.1</sup>L<sup>1.1</sup>S<sup>1.1</sup>A<sup>1.1</sup>V<sup>1.1</sup>L<sup>1.1</sup>C<sup>1.1</sup>H<sup>1.1</sup>P<sup>1.1</sup>K<sup>1.1</sup>Q<sup>1.1</sup>G<sup>1.1</sup>K<sup>1.1</sup>S<sup>1.1</sup>V<sup>1.1</sup>R<sup>1.1</sup>Q<sup>1.1</sup>Y<sup>1.1</sup>A<sup>1.1</sup>T<sup>1.1</sup>D<sup>1.1</sup>F<sup>1.1</sup>L<sup>1.1</sup>L<sup>1.1</sup>R<sup>1.1</sup>-1241  
 Cdd:pfam03732 2 LAVHSLRGAALTWKLSVARSIDAFDSWDEIKDAFLKR--FFPSTKIDLLRNELSLRGTGTSVREYVERFKRLARa1 77

NM\_001040434.2 1242 **HL**SWSDAIL**RTRF**LEGLSE 1260  
Cdd:pfam03732 78 p**H**GRDEEAL**ISAF**LRGLRP 97

PHA03247 super family [cl33720](#) large tegument protein UL36; Provisional  
large tegument protein UL36; Provisional

2359-3423 1.61e-06

The actual alignment was detected with superfamily member [PHA03247](#):

**Pssm-ID: 223021 [Multi-domain] Cd Length: 3151 Bit Score: 53.02 E-value: 1.61e-06**

NM\_001040434.2 787 LVRPPASGEIAPHSRTPYVGTISAPHMITTTASGVMTSPMKTSVPVSESATLLRPTDSGVMSITPLTRTPASRAKSRQMA 866  
 Cdd:PHA03247 2698 LADPPPPPTPECPAPHALVSATLPGGAAARQASPALPAAPAPPVAPGATPGGPAPRPPTTAGPPAPAPPAAPAA 2777

NM\_001040434.2 867 TAcgdmcp I PVRAPATAGISPSVRSPASS TstlIrr PSDGAVTAE LERVL GP AQFAAMTPGEMSKPL MRA —SAPGTT 944  
 Cdd:PHA03247 2778 GP PRLTRPAVASLSESRESLPS PWDPADPAVLAPAAALPPAASPAGLPPPTSA<sub>qp</sub>TAPPPP 2842

NM\_001040434.2 945 **T**M**L****S****P****M****T****S****G****E****M****S****P****L****M****K****T****T****P****S****G****T****M****S****T****L****Q****T****K****V****M****S****R****A****T****S****L****P****Q****P****r****n****a****a****s****g****i****a****n****P****P****R****A****P****A****S****G****A****S****T****L****M****R****V****S****S****G****M** 1021  
 Cdd:PHA03247 2843 **P****G****P****P****P****S****L****P****G****S****V****A****P****g****g****d****V****R****R****R****P****P****S****R****S****P****A****K****P****A****A****P****P****V****R****L****A****R****P****A****V****S****R****S****T****E****F****A****L****P****D****Q****E****R****P****P****G****M** 2912

NM\_001040434.2 1022 MSTPLLGATSGGMSMQMPPPTSGDMFSLMRSPAGGI MSTPQtafGIMTPLLNKATDSEASTSHTRftapgskSTPH 1101  
 Cdd:PH03247 2913 APPPPPPQPPPPPPQPPPPPPPPRQPLAPTTDPAGAGEPSGAVPQPNLGLVPRGVPFRFRVPPQPA 2983

NM\_001040434.2 1102 MTSTAPEMKTPPPKEVPSPFGMLTPALCYLLEEQEAAAGSS 1141  
 Cdd:PHA03247 2984 PSREAPASSTPLTGHSLSRVSSWASSLLAHEETDPPPVSS 3023

**Fig. S2-1**

Herpes\_BLLF1 super family [cl37540](#) Herpes virus major outer envelope glycoprotein (BLLF1); This family consists of the BLLF1 ... 838-1782 5.67e-03  
 Herpes virus major outer envelope glycoprotein (BLLF1); This family consists of the BLLF1 viral late glycoprotein, also termed gp350/220. It is the most abundantly expressed glycoprotein in the viral envelope of the Herpesviruses and is the major antigen responsible for stimulating the production of neutralising antibodies in vivo.

The actual alignment was detected with superfamily member [pfam05109](#):

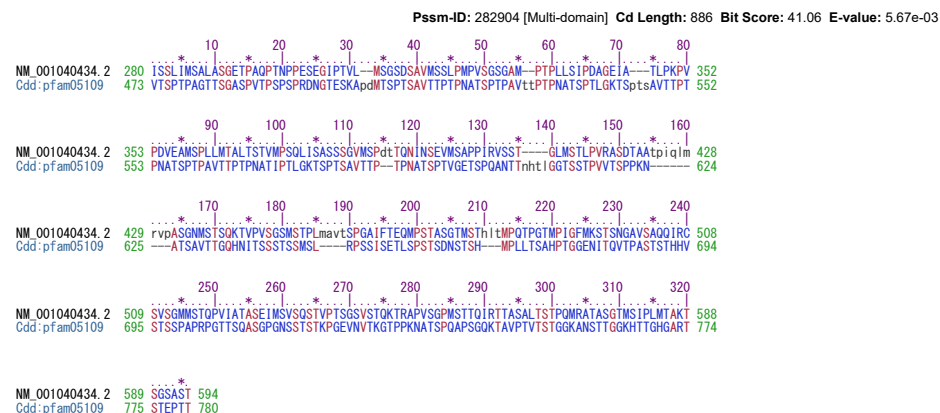

**Fig. S2 The result of a conserved domain search using NCBI CDD**

Three domains, the retrotransposon gag protein, large tegument protein UL36 and herpes virus major outer envelope glycoprotein (BLLF1), are listed in this order. The identical amino acids in the superfamily motifs and RTL9 are depicted in red.

**Fig. S2-2**

|                         |     |                                                                                   |     |
|-------------------------|-----|-----------------------------------------------------------------------------------|-----|
| Mouse RTL9<br>pfam05109 | 1   | ISSLIMSALASGETPAQPTNPPESGIP TVL--MSGSDSAVMSSLPMPVSGSGAM--PTPLLSIPDAGEIA---TLPKPV  | 80  |
|                         | 1   | VTSTPTAGTTSGASPVTPSPSPRDNGTESKApdMTSPTS AVTTTPNATSPTPAVttTPNATSPTLGKTSptsAVTTPT   | 80  |
| Mouse RTL9<br>pfam05109 | 81  | PDVEAMSPLLMTALTSTVMPSQLISASSSGVMSPdtTQNINSEVMSAPP IRVSST---GLMSTLPVRASDTAAtpiqlm  | 160 |
|                         | 81  | PNATSPTPAVTTTPNATIPTLGKTSPTS AVTTP--TPNATSPTVGETSPQANTTnhtlGGTSSTPVVTSPPKN-----   | 160 |
| Mouse RTL9<br>pfam05109 | 161 | rvpASGNMSTSQKTVPVSGSMSTPLmavtSPGAIFTEQMPSTASGTMSThltMPQTPGTMPIGFMKSTSN GAVSAQQIRC | 240 |
|                         | 161 | ---ATSAVTTGQHNITSSSTSSMSL----RPSSISETLSPSTSDNSTSH---MPLL TSAHPTGGENITQVTPASTSTHHV | 240 |
| Mouse RTL9<br>pfam05109 | 241 | SVSGMMSTQPVIATASEIMSVSQSTVPTSGSVSTQKTRAPVSGPMSTTQIRTTASALTSTPQMRATASGTMSIPLMTAKT  | 320 |
|                         | 241 | STSSPAPRPGTTSQASGPGNSSTSTKPGEVNVTKGTPPKNATSPQAPSGQKTAVPTVTSTGGKANSTGGKHTTG HGART  | 320 |
| Mouse RTL9<br>pfam05109 | 321 | SGSAST                                                                            | 326 |
|                         | 321 | STEPTT                                                                            | 326 |

Herpes\_BLLF1 super family  
identity 73/326 = 22.4%  
Similarity 125/326 = 38.3%

### Fig. S3 Pairwise alignment and identity between pfam05109 (BLLF1) and mouse RTL9

The N-terminal part of mouse RTL9 (280 aa – 594 aa) possessing homology to herpes BLLF1 super family motif was re-analyzed using EMBOS Water program and EMBOSS needle program as described in Materials and Methods. One and two dots represent similarities of amino acids, such as weekly and strong similar, respectively.

|                                |     |                                                                                  |     |
|--------------------------------|-----|----------------------------------------------------------------------------------|-----|
| <b>Mouse RTL9<br/>PHA03247</b> | 1   | LVRPPASGEIAPHSRTPVYGTISAPHMTTASGVMTMSPMKTSVPVSESATLLRPTDSGVMSIPLTRTPASRAKSRPQMA  | 80  |
|                                |     | ..  .....:..... ..... ..... ..... .....:..... .  .. .: .....                     |     |
|                                | 1   | LADPPPPPTPEPAPHALVSATPLPPGPAAARQASPALPAAPAPPAVPAGPATPGGPAPPARPPTTAGPPAPAPPAAPAA  | 80  |
| <b>Mouse RTL9<br/>PHA03247</b> | 81  | TAcgdmcp1PVRAPATAGISPSPVRSPASSt1stllrrPSDGAVTAELERVLGPAQFAAMTPGEMSKPLMRA--SAPGTT | 160 |
|                                |     | .. .  .... .. .. .... ..... .. .. ..... ... .: ..... ... : ...                   |     |
|                                | 81  | GP-----PRRLTRPAVASLSESRESLPS-----PWDPADPPAAVLAPAAALPPAASPAGPLPPPTSaqTAPPPP       | 160 |
| <b>Mouse RTL9<br/>PHA03247</b> | 161 | TMPLMSPMTSGEMSMP---LMKTTPSGTMSTLQTKVMSSRATSLPQPrnaasgvianPPQRAPASGAGSTPLMRVSGSGM | 240 |
|                                |     | .. .....:.. .... :.... :.....:..... .: ..... :.. .. .....                        |     |
|                                | 161 | PGPPPPSLPLGGSVAPggdVRRRPPSRSPAAPKPAAPARPPVRLARP-----AVSRSTESFALPPDQPERPPQSQ      | 240 |
| <b>Mouse RTL9<br/>PHA03247</b> | 241 | MSTPLLGATASGGMSMPQMAPPTSGDMFSPLMRSPAPGIMSTPQtafGMTPTLNKATDSGEASTSHTRFtapgskSTPH  | 320 |
|                                |     | ... ..... .. .. ..... :.... ..... .  .. ..... ... :..... .  ..                   |     |
|                                | 241 | APPPPPQPPQPPPPPPQPPPPPPPPRQPPLAPTTPAGAGEPS---GAVPQPWL GALVPGRVAVPRFRV-----PQPA   | 320 |
| <b>Mouse RTL9<br/>PHA03247</b> | 321 | MTSTAPEMKTPPPKEVPSFGMLTPALCYLLEEQAARGSS                                          | 360 |
|                                |     | ...  ...   .....:.. ..... .:.....                                                |     |
|                                | 321 | PSREAPASSTPPLTGHSLSRVSSWASSLALHEETDPPPV                                          | 360 |

PHA03247 super family  
identity 63/360 = 17.5%  
similarity 85/360 = 23.6%

### Fig. S4 Pairwise alignment and identity between PHA03247 family and mouse RTL9 protein

The middle of mouse RTL9 (787 aa –1141 aa) possessing homology to the PHA03247 super family motif was re-analyzed using the EMBOSS Water program and EMBOSS needle program. One and two dots represent similarities of amino acids, such as weekly and strong similar, respectively.

|                   |      |                                                     |      |
|-------------------|------|-----------------------------------------------------|------|
|                   | 131  | ELLFRHQPSRFVSDEAKVGFITSLLADKALSWAIAAVDLDPRLLSSDYSAF | 180  |
| <b>GAG</b>        |      | :..... ... :.. .. :.. .. ... .. : .....: .. ..      |      |
| <b>Mouse RTL9</b> | 1148 | EIDEEKQMKGFLDDSEKMAFLVSLHLGAAERWSILQMEVGNPISSDNKAF  | 1197 |
|                   | 181  | RREFKAVFEHPTYGEDAASRLALQQGSRVAEYTLFRILAAESRWGET     | 230  |
| <b>GAG</b>        |      | . .....: .. :.. .. :.. .. :.. .. .. .. .. .. ..     |      |
| <b>Mouse RTL9</b> | 1198 | LRRSQGLYDSLSEIDILSAVLCHPKQGKKSVRQYATDFLLARHLSWSDA   | 1247 |
|                   | 231  | ALRSAYRRGLSEAIKDLIVR---DRPSSLNELITLSLQMDERLRERRQER  | 277  |
| <b>GAG</b>        |      | .  :..... .. :.. .. :.. .. :.. .. .. .. .. .. ..    |      |
| <b>Mouse RTL9</b> | 1248 | ILRTRFLEGLSEAVTTKMGRIFLKVAGSLKELIDRSLYTECQLAEKD--   | 1295 |
|                   | 278  | AQRAGGSTRQLSHRTSSAPDFSLTSTAAPPPHILLQSPAHPSPRVGEEPM  | 327  |
| <b>GAG</b>        |      | :.  :.. :.. .  .. .. .. .. .. .. .. .. .. .. ..     |      |
| <b>Mouse RTL9</b> | 1296 | ---SSGNSNQV-----VP-----TS-----CKRNNEEAM             | 1316 |
|                   | 328  | --QIGRSRLSRQEREQRLR-DQLCLYCGNNG-----HFIQACPVRPK     | 366  |
| <b>GAG</b>        |      | :: .. :.. :.. .. .. .. .. .. .. .. .. .. .. .. ..   |      |
| <b>Mouse RTL9</b> | 1317 | ENELG---SQQQTEEHQHVPKRCYYLKEHGDPEESLHDHLRQSAGL-PK   | 1362 |
|                   | 367  | GPAHQ                                               | 371  |
| <b>GAG</b>        |      | . :::                                               |      |
| <b>Mouse RTL9</b> | 1363 | APT <sup>Red</sup> NK                               | 1367 |

**Red:** Amino Acids encoded in the exon 2  
**Light blue:** CCHC RNA-binding motif

**Sushi-ichi GAG**  
identity 65/255 = 25.5%  
similarity 110/255 = 43.1%

## Fig. S5 Pairwise alignment and identity between sushi-ichi GAG and mouse RTL9 (1)

A conserved domain search using NCBI CDD indicated that the C-terminal portion of mouse RTL9 (1169 aa –1260 aa) possesses homology to the Capsid motif of sushi-ichi retrotransposon GAG. However, the regions before and after the Capsid motif (1148 aa-1168 aa and 1261 aa-1367 aa) also exhibit homology to GAG (**Minimal GAG-like region**). The AAs in *Rtl9* exon 2 are shown in red. The AAs of the CCHC motif of GAG are shown in light blue. One and two dots represent similarities of amino acids, such as weakly and strong similar, respectively.



|                   |      |                                                      |      |
|-------------------|------|------------------------------------------------------|------|
| <b>GAG</b>        | 6    | TPGQ-----PGGPRTPTLP--SPLERRVEAHSACLSSSLQSELTKAFPT    | 46   |
| <b>Mouse RTL9</b> | 927  | TPGEMSKPLMRASAPGTTTLMPLMSPMT-----SGEMS---MPLMKTTPS   | 967  |
| <b>GAG</b>        | 47   | IQGEISELQSSSQTTSSSTLSALSNOQMSAMATVLASIIQK-----LGSDP- | 90   |
| <b>Mouse RTL9</b> | 968  | --GTMSTLQ--TKVMSSRATSLPQPRNAASGVIANPPQRAPASGAGSTPL   | 1013 |
| <b>GAG</b>        | 91   | -----GGAAPSEPSLP--LSPRAEPNLASP-----                  | 113  |
| <b>Mouse RTL9</b> | 1014 | MRVSGSGMMSTPLLGAATSGGMSMPQMAPPTSGDMFSPLMRSPAPGIMST   | 1063 |
| <b>GAG</b>        | 114  | --RVFG-----GDFDL-----GKGFLHQ-----                    | 129  |
| <b>Mouse RTL9</b> | 1064 | PQTAFGMTPTLNVKATDSGEASTSHTRFTAPGSKSTPHMTSTAPEMKTTP   | 1113 |
| <b>GAG</b>        | 130  | -----CELLFRHQPSR-----FVSDE                           | 145  |
| <b>Mouse RTL9</b> | 1114 | PKEVPSFGMLTPALCYLLEEQAARGSSSVVEEDAEEDIDEEKQMKGFLDDS  | 1163 |
| <b>GAG</b>        | 146  | AKVGFITSLLDKALSWAIAAVDLDPRLSSDYSAFRREFKAVFEHPTYGE    | 195  |
| <b>Mouse RTL9</b> | 1164 | EKMAFLVSLHLGAAERWSILQMEVGNPISSDNKAFLRRSQGLYDSLSEID   | 1213 |
| <b>GAG</b>        | 196  | DAASRLALQQGSRSVAEYTLFRILAAESRWGETALRSAYRRGLSEAIK     | 245  |
| <b>Mouse RTL9</b> | 1214 | ILSAVLCHPKQGKKSVRQYATDFLLARHLWSDAILRTRFLEGLSEAVT     | 1263 |
| <b>GAG</b>        | 246  | DLIVR---DRPSSLNELITLSLQMDERLRERRQERAQRAGGSTRQLSHRT   | 292  |
| <b>Mouse RTL9</b> | 1264 | TKMGRIFLKVAGSLKELIDRSLYTECQLAEKD-----SSGNSNQV----    | 1304 |
| <b>GAG</b>        | 293  | SSAPDFSLTSTAAPPHILLQSPAHPSPRVGEEPM--QIGRSRLSRQERE    | 340  |
| <b>Mouse RTL9</b> | 1305 | --VP---TS-----CKRNNEEAMENELG-----SQQQTE              | 1328 |
| <b>GAG</b>        | 341  | QRLR-DQLCLYCGNNG-----HFIQACPVRPKGPAHQ                | 371  |
| <b>Mouse RTL9</b> | 1329 | EHQHVPKRCYYLKEHGDPQESLHDHLRQSAGL-PKAPTNNK            | 1367 |

Sushi-ichi GAG  
identity 108/490 = 21.8%  
similarity 175/490 = 35.7%

**Fig. S6 Pairwise alignment and identity between sushi-ichi GAG and mouse RTL9 (2)**

Entire sushi-ichi GAG exhibits homology to mouse RTL9 (927 aa-1357 aa, **Maximal GAG-like region**).

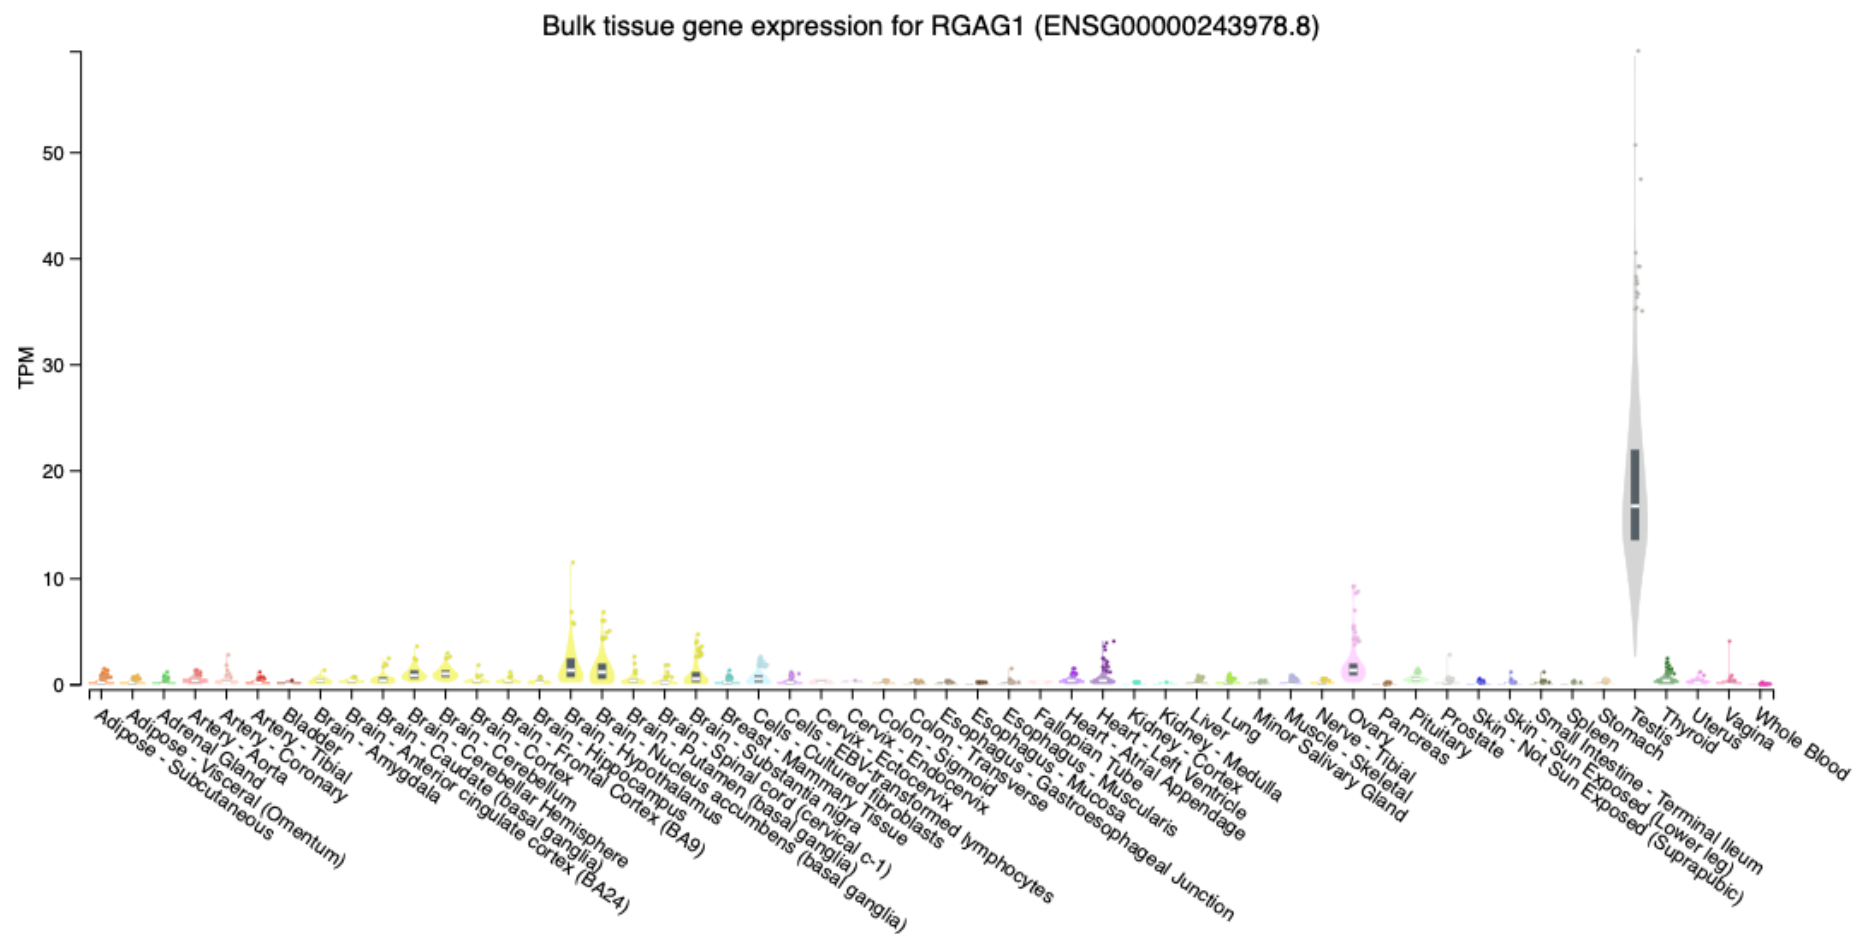

**Fig. S7 *RTL9* (*RGAG1*) expression in human tissues and organs**

See the original data at <https://gtexportal.org/home/gene/RGAG1> (accessed on 2 June 2023)

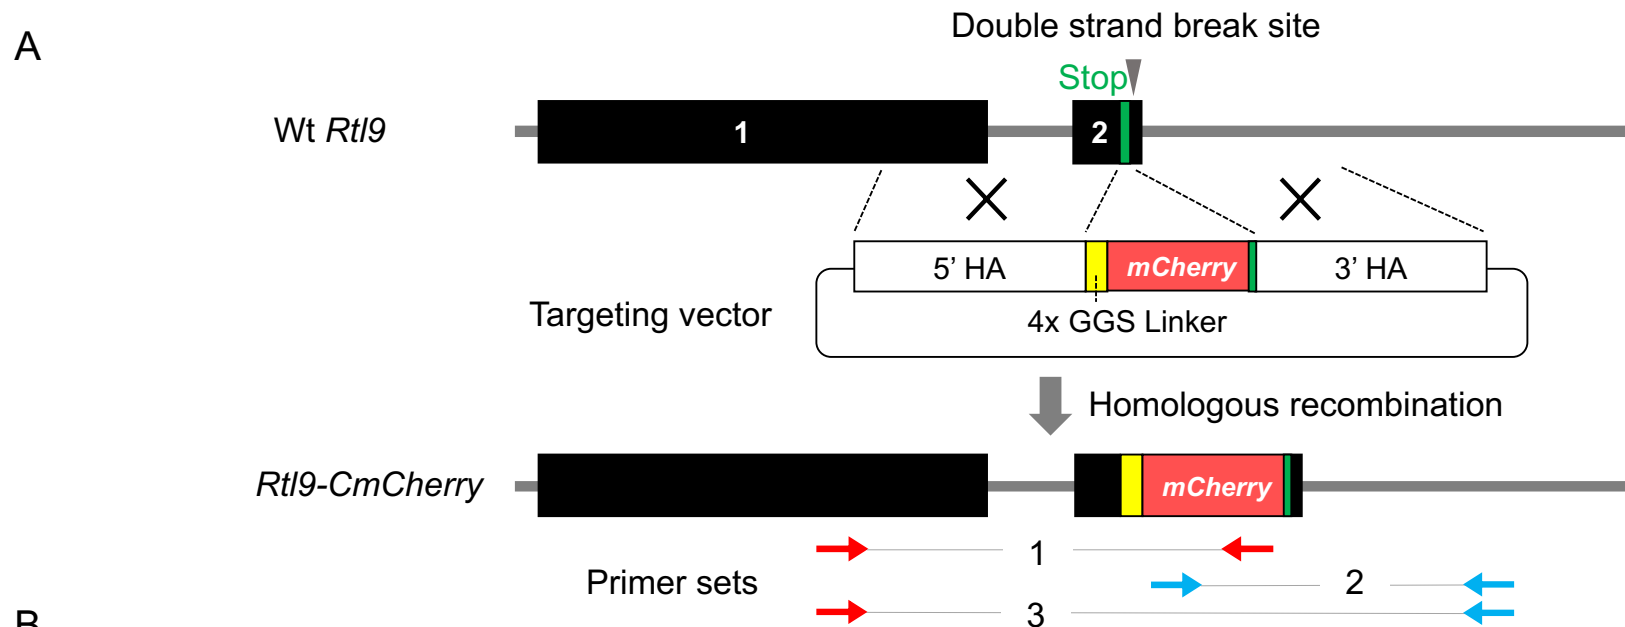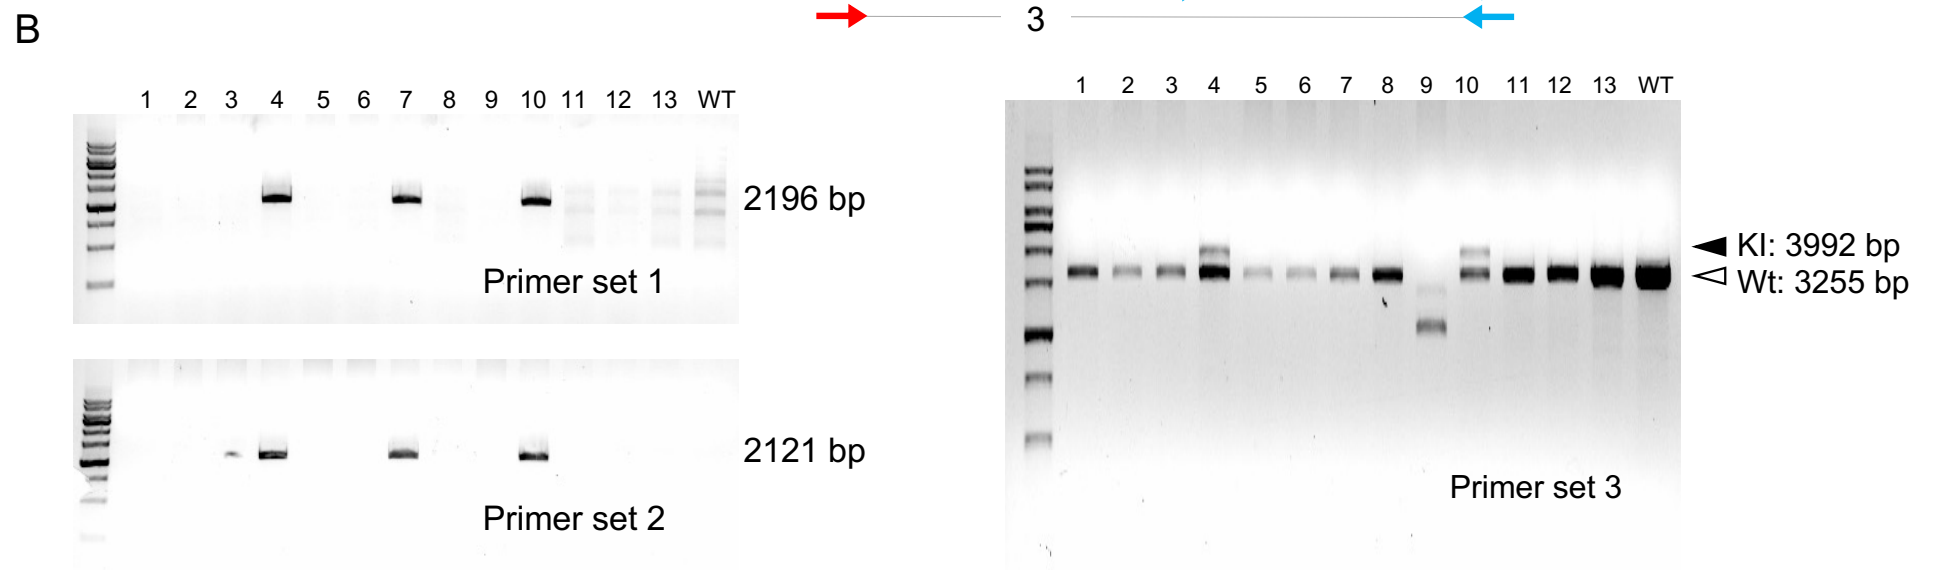

Fig. S8 Making of *Rtl9-mCherry* KI mouse

### Fig. S8 Generation of the *Rtl9CmC* KI mouse

**A)** Schematic representation of the generation of the *Rtl9CmC* KI mouse. *Rtl9* exon 1 and 2 are numbered and shown in black. The stop codon is shown in green. The genomic locus near the stop codon in exon2 of *Rtl9* was cut out using the CRISPR/Cas system and homologous recombination was induced between the Wt *Rtl9* locus and a targeting vector containing 5' and 3' homology arms (5' HA and 3' HA), a 4x GGS linker and the mCherry coding sequence. The reconstructed *Rtl9CmC* has mCherry at the C-terminus. The position of the PCR primer sets for genotyping is indicated (red and light blue arrows). Cross symbols means homologous recombination. **B)** The results of genotyping 13 founder (F0) mice. Genomic PCR was performed using the primer sets 1 to 3 shown in A. The number (#) of F0 mice is indicated above the gel images. Wild type (WT) mouse genome was used as a control. Based on the genotyping PCR data, the offspring of F0 mouse #4 and #10 were used for further experiments.

PCR primer sets for genotyping of KI and KO mice

| Mutant               | Primer set name | Direction | Sequence               |
|----------------------|-----------------|-----------|------------------------|
| <i>Rtl9-CmCherry</i> | Primer set 1    | F         | GGAATGATGTCCACGCCACTA  |
|                      |                 | R         | CTTCAGCTTCAGCCTCTGCT   |
|                      | primer set 2    | F         | CCTGTCCCCTCAGTTCATGT   |
|                      |                 | R         | CCTAGACTATTGGACCAGAGG  |
|                      | Primer set 3    | F         | GGAATGATGTCCACGCCACTA  |
|                      |                 | R         | CCTAGACTATTGGACCAGAGG  |
| <i>Rtl9-KO</i>       | Primer set 4    | F         | GAGAACACCAGCTTCTAGAGC  |
|                      |                 | R         | GGGAGTTCAGAACCTCATACAC |

A

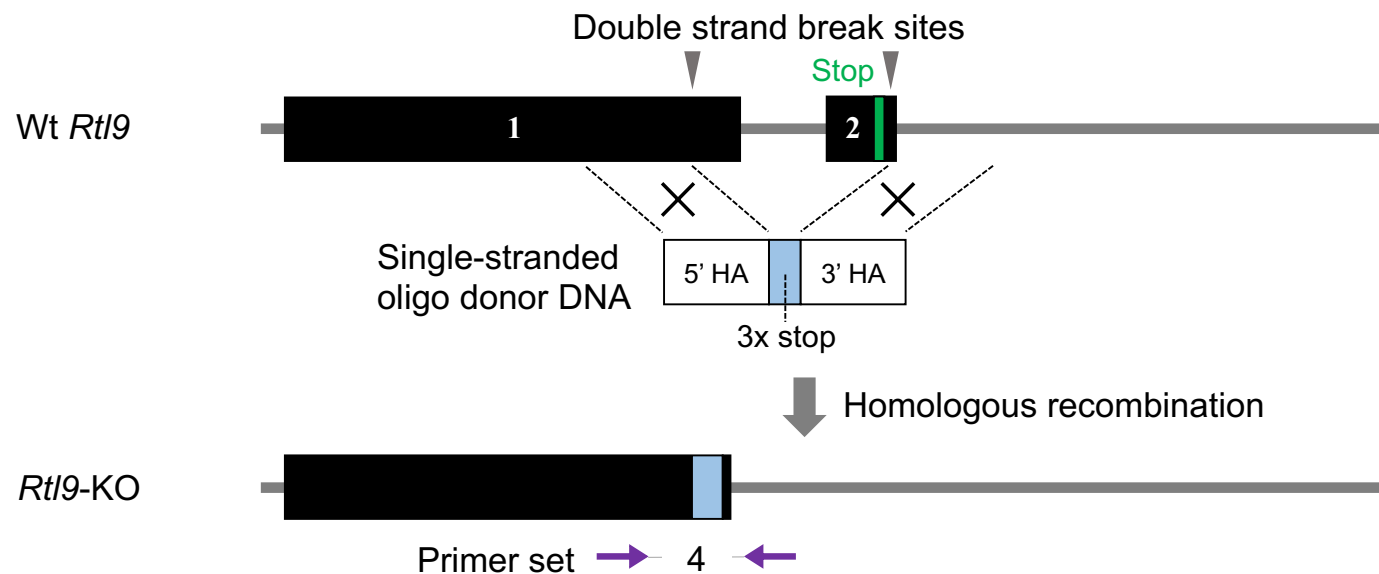

B

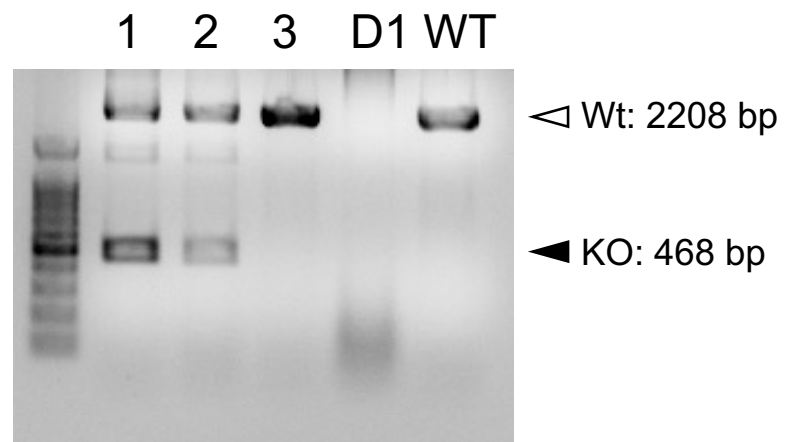

Fig. S9-1 Making of *Rtl9* KO mouse

C

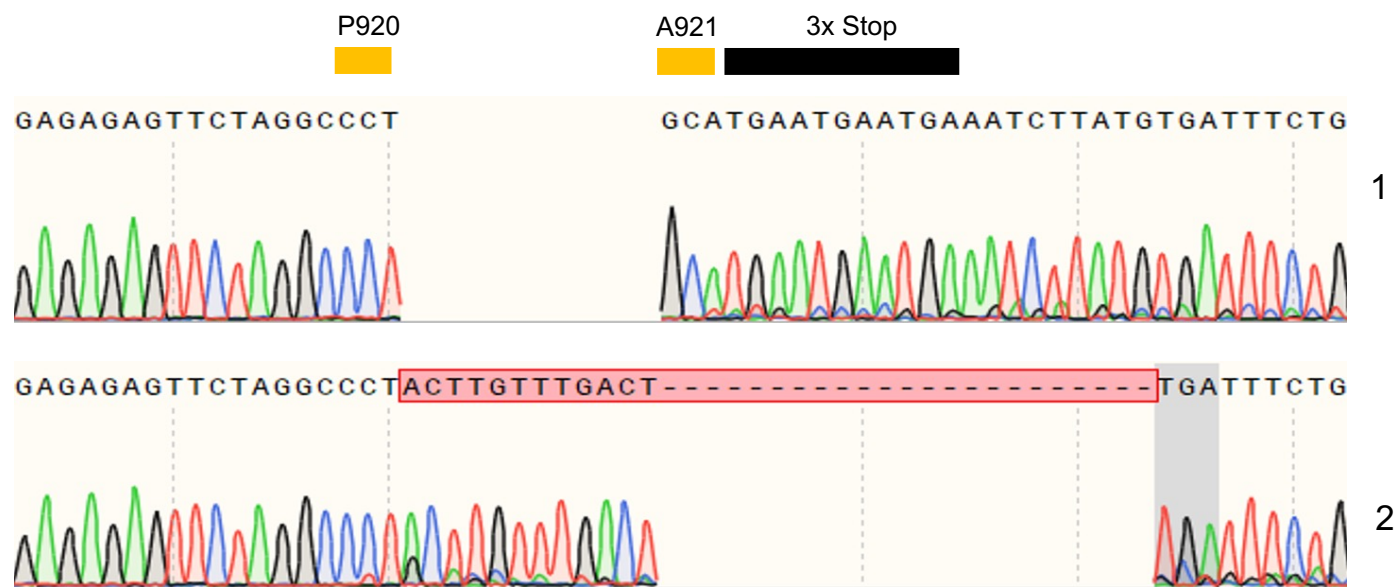

Fig. S9-2 Making of *Rtl9* KO mouse

### **Fig. S9 Making of *Rtl9* KO mouse**

**A)** Schematic representation of the generation of the *Rtl9* KO mouse. *Rtl9* exons 1 and 2 are numbered and shown in black. The stop codon is shown in green. The genomic locus encoding alanine 921 (A921) and downstream of the *Rtl9* stop codon was cut using the CRISPR/Cas system, and homologous recombination was induced between the Wt *Rtl9* locus and single-stranded oligo donor DNA containing a sequence of 3 stop codons (3x stop) and 5' and 3' homology arms (5' HA and 3' HA). In the reconstructed *Rtl9*-KO allele, the genomic region from glutamine 922 to the stop codon of *Rtl9* was deleted and replaced by a 3x stop. The position of the PCR primer set used for genotyping is indicated as purple arrows. **B)** Results of genotyping of 3 surviving and 1 dead (D1) F0 mice. Genomic PCR was performed with the primer set 4 shown in A. The number (#) of F0 mice, including D1, is indicated above the gel image. Wild type (WT) mouse genome was used as a control. **C)** Illustrated results of Sanger sequencing using the founder (F0) mice #1 and 2 shown in B. In F0 mouse #1 (top), a 3x stop was inserted at the expected genomic position just after A921 of *Rtl9*. In #2 (bottom), 12 extra bases (highlighted in red) were unexpectedly inserted just before a stop codon (highlighted in grey). Based on the Sanger sequencing data, the offspring of F0 mouse #1 were used for further experiments. The PCR primer sets for genotyping the KO mice are presented in the Fig. S6 legend.

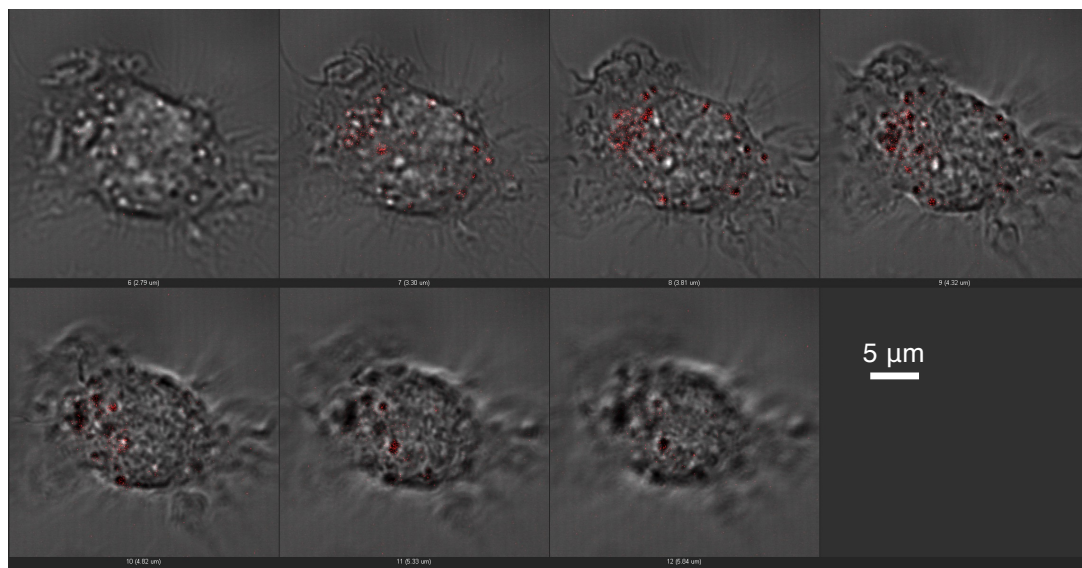

**Fig. S10 mCherry signals in isolated microglia isolated from *Rtl9CmC* KI brain**

Microglia were isolated from P0 neonatal brain and cultured for 10 days. The microglial cells were collected from the cultured Petri dishes (mixed glia cultures) by tapping (Lian et al., 2016; Irie et al., 2022).

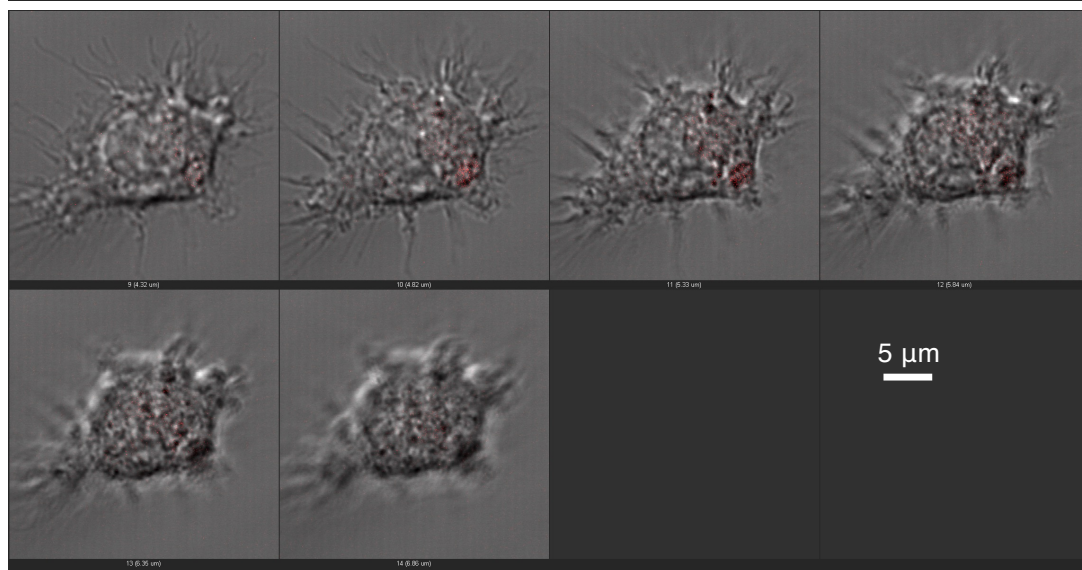



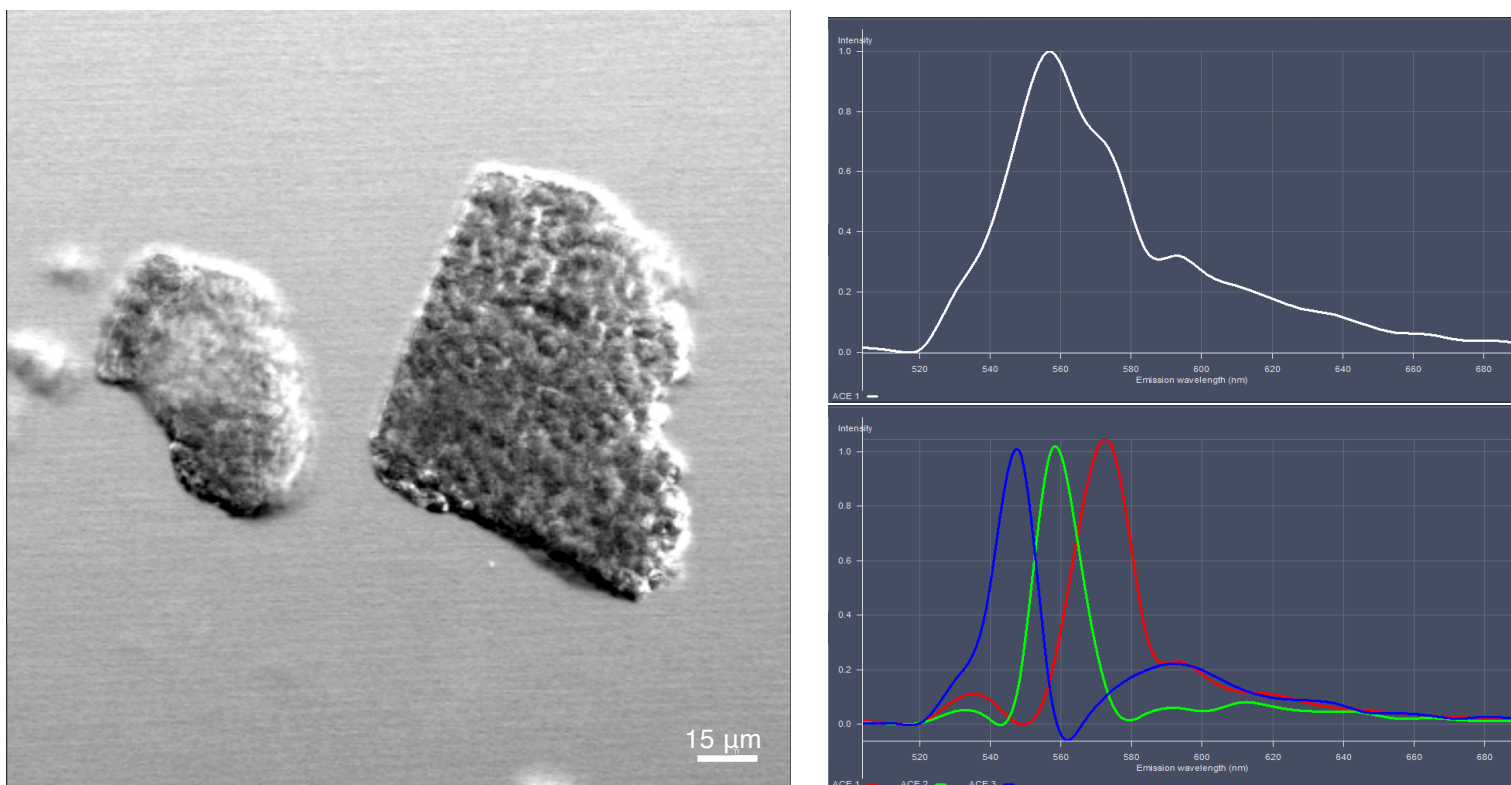

**Fig. S11 The autofluorescence spectrum of Zymosan**

Left: Transmission image. Right: Autofluorescence spectrum. Single (top) and/or the strongest signal (Maximum peak emission fluorescence wavelength: 570 nm) among 3 representative signals were used to detect zymosan.

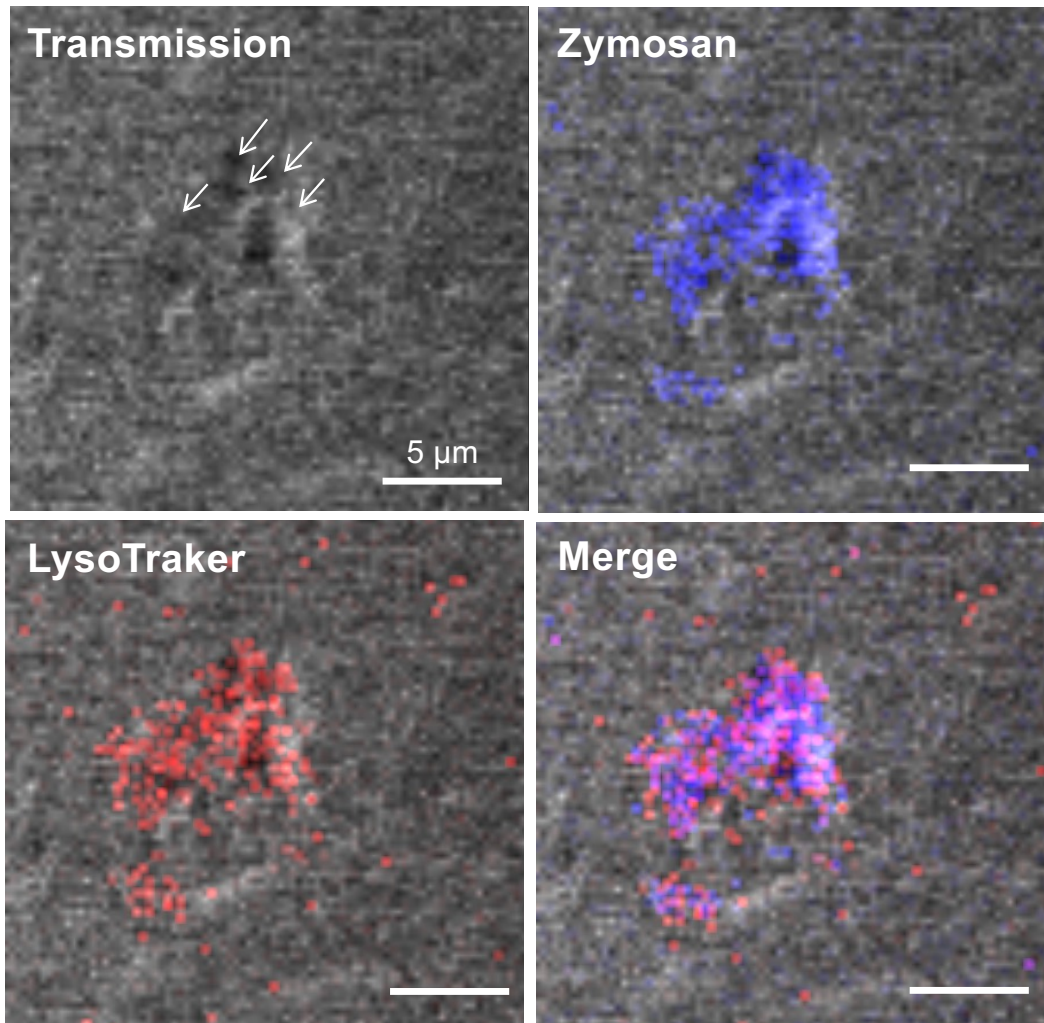

**Fig. S12 Zymosan is visible in the transmission image**

Zymosan incorporated in lysosomes in the *Rtl9* KO brain. Top, left: A transmission image. Arrows indicate zymosan aggregates. Top, right: zymosan autofluorescence (light blue). Bottom, left: The LysoTracker signal (red). Bottom, right: A merged image. Zymosan is distinguishable by its shape in the transmission image(s) in addition to its specific fluorescence signal. The same samples as in Fig. 3E were analyzed.

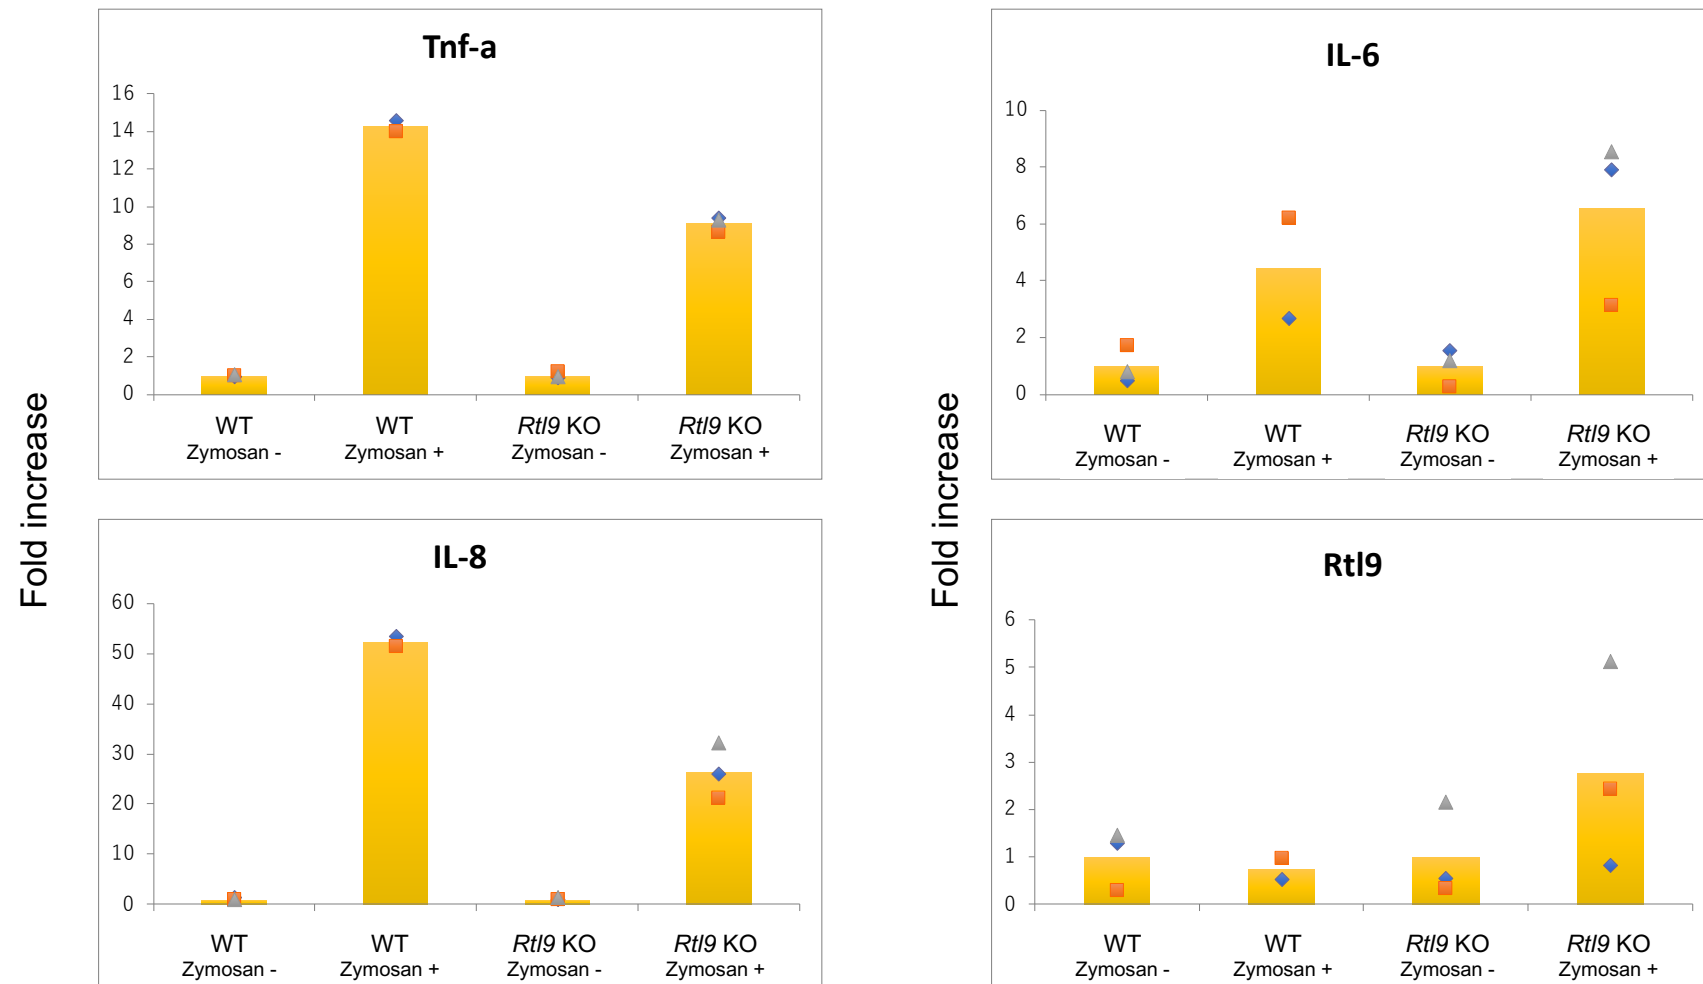

Fig. S13 Zymosan induces *Tnfa*, *Il6* and *Il8* expression in both WT and *Rtl9* KO microglia

**Fig. S13 Zymosan induces *Tnfa*, *Il6* and *Il8* expression in both WT and *Rtl9* KO microglia**

*Tnfa*, *Il6*, *Il8* and *Rtl9* mRNA were analyzed at 0 min (no administration) and 30 min after zymosan administration to WT and *Rtl9* KO microglia (n=3 each, shown in different colors and shapes). The expression levels are averaged with non-administration samples as 1. *Rtl6* primers were designed for the 3'-UTR, and were therefore also present in the *Rtl9* KO microglia. It should be noted that the *Rtl9* mRNA itself increases upon zymosan administration in *Rtl9* KO microglia, presumably due to feedback regulation of the RTL9 protein.

The PCR primers used were as follows:

*Tnfa*, 5'-GACAAGGCTGCCCCGACTACG-3' (forward) and 5'-CTTGGGGCAGGGGCTCTTGAC-3' (reverse); *Il6*, 5'-AGTTGCCTTCTTGGGACTGA-3'(forward) and 5'-CCTCCGACTTGTGAAGTGGT-3' (reverse); *Il8*: 5'-CTCTCAAGGGCGGTCAAAAAGTT-3' (forward) and 5'-TCAGACAGCGAGGCACATCAGGTA-3'(reverse); *Rtl9*: 5'-TCACCTACATGCCTGTGACC-3' (forward) and 5'-CAACAACACCACATTGTTACGG-3' (reverse).
